# Supplementary material for: Error control variability in pathway-based microarray analysis
Source: PubMed Central journal article supplement — Bioinformatics. 2009 Jun 26;25(17):2216–21. doi: 10.1093/bioinformatics/btp385 (PMC2734315; doi:10.1093/bioinformatics/btp385), 2009-06-26
Supplement: btp385_1.pdf [file btp385_1.pdf]

**Supplmentary Materials for, Error control  
variability in pathway-based microarray  
analysis.**

by (David L. Gold, Jeffrey C. Miecznikowski  
and Song Liu)

May 7, 2009

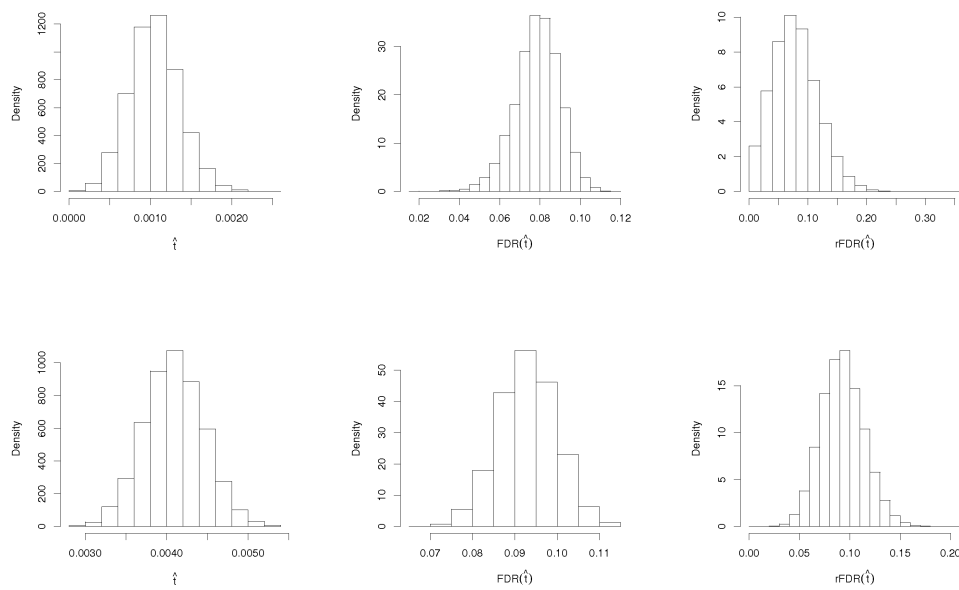

Figure 1: Simulation of sampling variability  $N = 5,000$  tests, BH control at 10%. Top row Simulation 1, bottom row Simulation 2.

Table 1: FDR Control Simulation

| $\alpha$ | Simulation | Measure                | Mean        | S.D.        | Q1          | Q3          | Percent 0's |
|----------|------------|------------------------|-------------|-------------|-------------|-------------|-------------|
| 0.1      | 1          | $\text{FDR}(\hat{t})$  | 0.06490253  | 0.04440780  | 0.02661292  | 0.09945102  | 0.15630000  |
| 0.1      | 1          | $\text{rFDR}(\hat{t})$ | 0.05968226  | 0.15631118  | 0.00000000  | 0.00000000  | 0.82362300  |
| 0.1      | 2          | $\text{FDR}(\hat{t})$  | 0.06466942  | 0.03703513  | 0.03612314  | 0.09113119  | 0.00040000  |
| 0.1      | 2          | $\text{rFDR}(\hat{t})$ | 0.06444959  | 0.08895831  | 0.00000000  | 0.11111111  | 0.56355100  |
| 0.01     | 1          | $\text{FDR}(\hat{t})$  | 0.004857392 | 0.007650451 | 0.000000000 | 0.009045793 | 0.603100000 |
| 0.01     | 1          | $\text{rFDR}(\hat{t})$ | 0.001805742 | 0.039327402 | 0.000000000 | 0.000000000 | 0.997604000 |
| 0.01     | 2          | $\text{FDR}(\hat{t})$  | 0.004613782 | 0.003818927 | 0.001238682 | 0.007217677 | 0.001800000 |
| 0.01     | 2          | $\text{rFDR}(\hat{t})$ | 0.004574139 | 0.027852792 | 0.000000000 | 0.000000000 | 0.968182000 |

Table 2: Mean and S.D. of Counts of Cervical Cancer Pathways Detected with GSA.

|            | <i>BH</i> |      |      |       |       |       |       |       |       |       |       |       |
|------------|-----------|------|------|-------|-------|-------|-------|-------|-------|-------|-------|-------|
| $\alpha =$ | 0.001     | 0.01 | 0.05 | 0.1   | 0.15  | 0.175 | 0.2   | 0.225 | 0.25  | 0.3   | 0.325 | 0.35  |
| Mean       | 6.8       | 6.8  | 8.48 | 10.26 | 11.56 | 12.3  | 13.26 | 13.65 | 14.72 | 16.53 | 17.76 | 18.51 |
| S.D.       | 2.4       | 2.4  | 3.27 | 3.29  | 3.38  | 3.46  | 3.33  | 3.49  | 3.76  | 4.22  | 4.66  | 5.03  |

---

|       | <i>KBIN</i> |     |      |       |       |       |       |       |       |       |       |       |
|-------|-------------|-----|------|-------|-------|-------|-------|-------|-------|-------|-------|-------|
| $K =$ | 0           | 1   | 2    | 3     | 4     | 5     | 6     | 7     | 8     | 9     | 10    | 11    |
| Mean  | 6.8         | 6.8 | 9.85 | 10.83 | 12.27 | 12.85 | 13.91 | 14.98 | 15.95 | 16.57 | 17.57 | 18.49 |
| S.D.  | 2.4         | 2.4 | 2.59 | 2.49  | 2.4   | 2.41  | 2.35  | 2.31  | 2.55  | 2.61  | 2.85  | 2.88  |

Table 3: Mean and S.D. of Counts of Cervical Cancer Pathways Detected with GSEA.

|            | <i>BH</i> |      |      |      |      |       |      |       |       |       |       |       |
|------------|-----------|------|------|------|------|-------|------|-------|-------|-------|-------|-------|
| $\alpha =$ | 0.001     | 0.01 | 0.05 | 0.1  | 0.15 | 0.175 | 0.2  | 0.225 | 0.25  | 0.3   | 0.325 | 0.35  |
| Mean       | 3.73      | 3.73 | 4.19 | 5.67 | 7.09 | 7.95  | 8.74 | 9.46  | 10.64 | 12.21 | 13.94 | 15.45 |
| S.D.       | 1.57      | 1.57 | 2.29 | 2.7  | 3.45 | 3.88  | 4.34 | 4.79  | 5.41  | 6.17  | 6.62  | 6.87  |

---

|       | <i>KBIN</i> |      |      |      |      |      |       |       |       |       |       |       |
|-------|-------------|------|------|------|------|------|-------|-------|-------|-------|-------|-------|
| $K =$ | 0           | 1    | 2    | 3    | 4    | 5    | 6     | 7     | 8     | 9     | 10    | 11    |
| Mean  | 3.73        | 3.73 | 6.27 | 7.11 | 8.86 | 9.65 | 11.12 | 12.51 | 13.94 | 14.65 | 15.88 | 16.92 |
| S.D.  | 1.57        | 1.57 | 2.18 | 2.5  | 2.78 | 2.96 | 3.08  | 3.32  | 3.44  | 3.54  | 3.67  | 3.86  |

Table 4: Mean and S.D. of Counts of Smoking Related Pathways Detected with GSA.

|            |       | <i>BH</i> |      |      |      |       |      |       |      |      |       |       |  |
|------------|-------|-----------|------|------|------|-------|------|-------|------|------|-------|-------|--|
| $\alpha =$ | 0.001 | 0.01      | 0.05 | 0.1  | 0.15 | 0.175 | 0.2  | 0.225 | 0.25 | 0.3  | 0.325 | 0.35  |  |
| Mean       | 3.75  | 3.75      | 4.28 | 5.41 | 5.41 | 6.43  | 7.41 | 8.2   | 9.08 | 10   | 11    | 11.91 |  |
| S.D.       | 2.45  | 2.45      | 3.29 | 4.19 | 4.19 | 4.96  | 5.6  | 6.08  | 6.57 | 7.22 | 7.72  | 8.36  |  |

---

|       |      | <i>KBIN</i> |      |      |      |      |       |       |       |       |      |       |  |
|-------|------|-------------|------|------|------|------|-------|-------|-------|-------|------|-------|--|
| $K =$ | 0    | 1           | 2    | 3    | 4    | 5    | 6     | 7     | 8     | 9     | 10   | 11    |  |
| Mean  | 3.75 | 3.75        | 5.11 | 7.15 | 7.95 | 9.3  | 10.01 | 11.09 | 11.72 | 12.64 | 13.5 | 14.01 |  |
| S.D.  | 2.45 | 2.45        | 3.18 | 3.95 | 4.19 | 4.51 | 4.82  | 5.04  | 5.19  | 5.32  | 5.52 | 5.67  |  |

CT

Table 5: Mean and S.D. of Counts of Smoking Related Pathways Detected with GSEA.

|            |       | <i>BH</i> |      |      |      |       |      |       |      |      |       |      |  |
|------------|-------|-----------|------|------|------|-------|------|-------|------|------|-------|------|--|
| $\alpha =$ | 0.001 | 0.01      | 0.05 | 0.1  | 0.15 | 0.175 | 0.2  | 0.225 | 0.25 | 0.3  | 0.325 | 0.35 |  |
| Mean       | 0.82  | 0.82      | 0.86 | 0.93 | 1.33 | 1.53  | 1.65 | 2.1   | 2.8  | 3.27 | 3.71  | 4.17 |  |
| S.D.       | 1.12  | 1.12      | 1.36 | 1.68 | 2.07 | 2.61  | 3.03 | 3.22  | 4.23 | 4.68 | 5.3   | 5.74 |  |

---

|       |      | <i>KBIN</i> |      |      |      |      |      |      |      |      |      |      |  |
|-------|------|-------------|------|------|------|------|------|------|------|------|------|------|--|
| $K =$ | 0    | 1           | 2    | 3    | 4    | 5    | 6    | 7    | 8    | 9    | 10   | 11   |  |
| Mean  | 0.82 | 0.82        | 1.44 | 3.04 | 3.59 | 5.21 | 5.74 | 7.01 | 7.55 | 8.79 | 9.7  | 10.4 |  |
| S.D.  | 1.12 | 1.12        | 1.62 | 2.31 | 2.32 | 2.92 | 3.26 | 3.65 | 3.8  | 4.05 | 4.18 | 4.38 |  |

Table 6: Mean and S.D. of Counts of AMKL Pathways Detected with GSA.

|            |       | <i>BH</i> |      |      |      |       |      |       |      |      |       |      |  |
|------------|-------|-----------|------|------|------|-------|------|-------|------|------|-------|------|--|
| $\alpha =$ | 0.001 | 0.01      | 0.05 | 0.1  | 0.15 | 0.175 | 0.2  | 0.225 | 0.25 | 0.3  | 0.325 | 0.35 |  |
| Mean       | 0.28  | 0.28      | 0.28 | 0.35 | 0.36 | 0.36  | 0.56 | 0.56  | 0.56 | 0.84 | 0.92  | 1.06 |  |
| S.D.       | 0.6   | 0.6       | 0.6  | 0.8  | 0.82 | 0.82  | 1.27 | 1.27  | 1.27 | 1.79 | 2.06  | 2.47 |  |

---

|       |      | <i>KBIN</i> |      |      |      |      |      |      |      |      |      |      |  |
|-------|------|-------------|------|------|------|------|------|------|------|------|------|------|--|
| $K =$ | 0    | 1           | 2    | 3    | 4    | 5    | 6    | 7    | 8    | 9    | 10   | 11   |  |
| Mean  | 0.28 | 0.28        | 1.02 | 1.43 | 2.26 | 2.65 | 3.33 | 4.24 | 5.1  | 5.41 | 6.25 | 6.88 |  |
| S.D.  | 0.6  | 0.6         | 1.14 | 1.38 | 1.81 | 1.97 | 2.26 | 2.6  | 2.88 | 3.03 | 3.44 | 3.66 |  |

Table 7: Mean and S.D. of Counts of AMKL Pathways Detected with GSEA.

|            |       | <i>BH</i> |      |      |      |       |      |       |      |      |       |      |  |
|------------|-------|-----------|------|------|------|-------|------|-------|------|------|-------|------|--|
| $\alpha =$ | 0.001 | 0.01      | 0.05 | 0.1  | 0.15 | 0.175 | 0.2  | 0.225 | 0.25 | 0.3  | 0.325 | 0.35 |  |
| Mean       | 0.33  | 0.33      | 0.33 | 0.33 | 0.37 | 0.45  | 0.67 | 0.67  | 0.68 | 0.99 | 1.04  | 1.15 |  |
| S.D.       | 0.65  | 0.65      | 0.65 | 0.65 | 0.75 | 1.07  | 1.26 | 1.26  | 1.29 | 1.84 | 1.99  | 2.29 |  |

---

|       |      | <i>KBIN</i> |      |      |      |      |      |      |      |      |      |      |  |
|-------|------|-------------|------|------|------|------|------|------|------|------|------|------|--|
| $K =$ | 0    | 1           | 2    | 3    | 4    | 5    | 6    | 7    | 8    | 9    | 10   | 11   |  |
| Mean  | 0.33 | 0.33        | 1.25 | 1.64 | 2.51 | 2.95 | 3.72 | 4.38 | 5.2  | 5.62 | 6.45 | 7.21 |  |
| S.D.  | 0.65 | 0.65        | 1.14 | 1.37 | 1.67 | 1.81 | 2.14 | 2.22 | 2.54 | 2.6  | 2.68 | 2.93 |  |
